# Supplementary material for: Synergistic copper nanoparticles and adjacent single atoms on biomass-derived N-doped carbon toward overall water splitting
Source: Royal Society of Chemistry journal article supplement (doi:10.1039/d2qi02285k), 2022-11-25
Supplement: d2qi02285k1.pdf [file d2qi02285k1.pdf]

## Supporting Information

Synergistic copper nanoparticles and adjacent single atoms on biomass-derived N-doped carbon toward overall water splitting

**Authors:**

Wenjun Zhang<sup>1</sup>, Ruoqi Liu<sup>1</sup>, Ziyi Fan<sup>1</sup>, Huiming Wen<sup>1</sup>, Yu Chen<sup>2</sup>, Ronghe Lin<sup>3,4</sup>, Yinlong Zhu<sup>5</sup>, Xiaofei Yang<sup>1</sup>, and Zupeng Chen<sup>1\*</sup>

**Affiliation:**

<sup>1</sup>Jiangsu Co-Innovation Center of Efficient Processing and Utilization of Forest Resources, International Innovation Center for Forest Chemicals and Materials, College of Chemical Engineering, Nanjing Forestry University, Nanjing 210037, China.

<sup>2</sup>Monash Centre for Electron Microscopy, Monash University, Clayton, Victoria 3800, Australia.

<sup>3</sup>Hangzhou Institute of Advanced Studies, Zhejiang Normal University, 1108 Gengwen Road, Hangzhou 311231, China.

<sup>4</sup>Key Laboratory of the Ministry of Education for Advanced Catalysis Materials, Zhejiang Normal University, 688 Yingbin Road, Jinhua 321004, China.

<sup>5</sup>Institute for Frontier Science, Nanjing University of Aeronautics and Astronautics, Nanjing 210016, China.

\*Address correspondence to: [czp@njfu.edu.cn](mailto:czp@njfu.edu.cn)

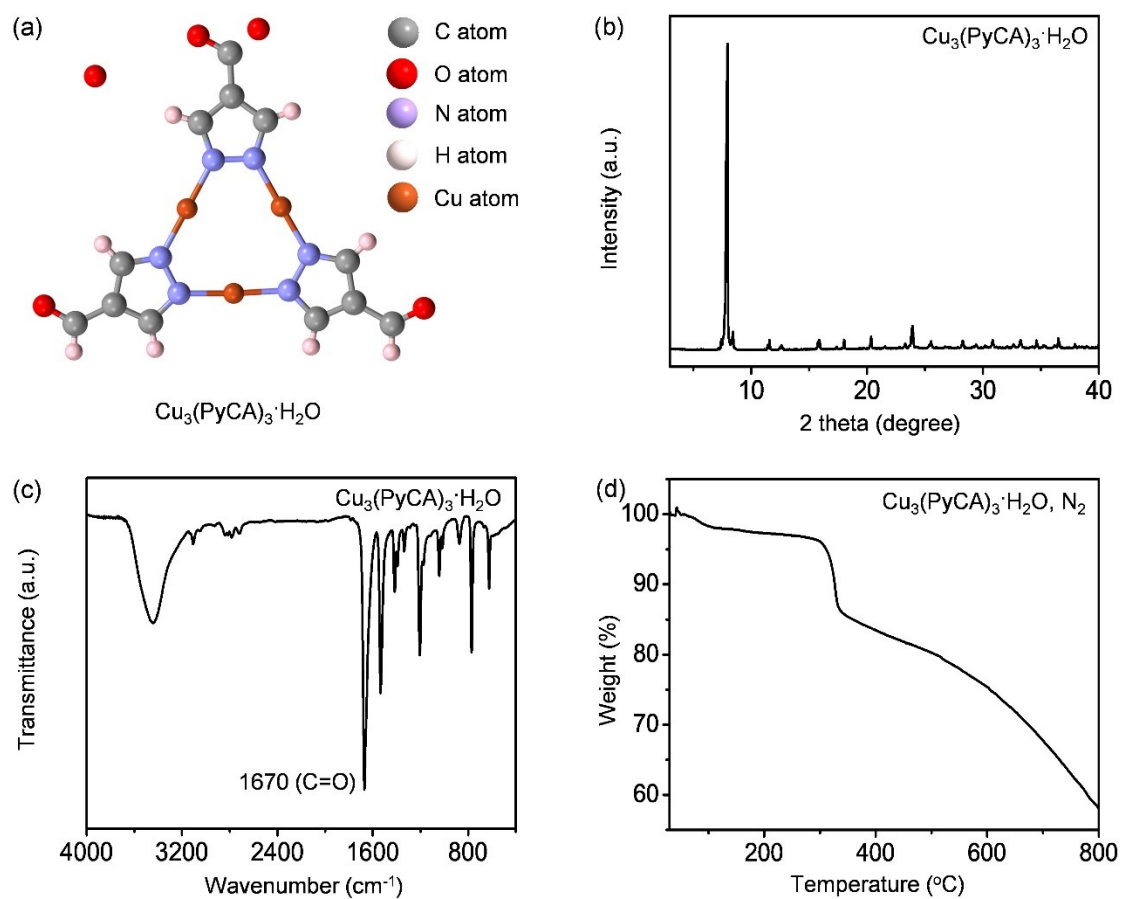

**Fig. S1.** (a) Ball and stick illustration of  $\text{Cu}_3(\text{PyCA})_3 \cdot \text{H}_2\text{O}$  complex in single crystal form. (b) PXRD pattern and (c) FT-IR spectrum of  $\text{Cu}_3(\text{PyCA})_3 \cdot \text{H}_2\text{O}$ . (d) TG curve of  $\text{Cu}_3(\text{PyCA})_3 \cdot \text{H}_2\text{O}$  measured in  $\text{N}_2$  atmosphere.

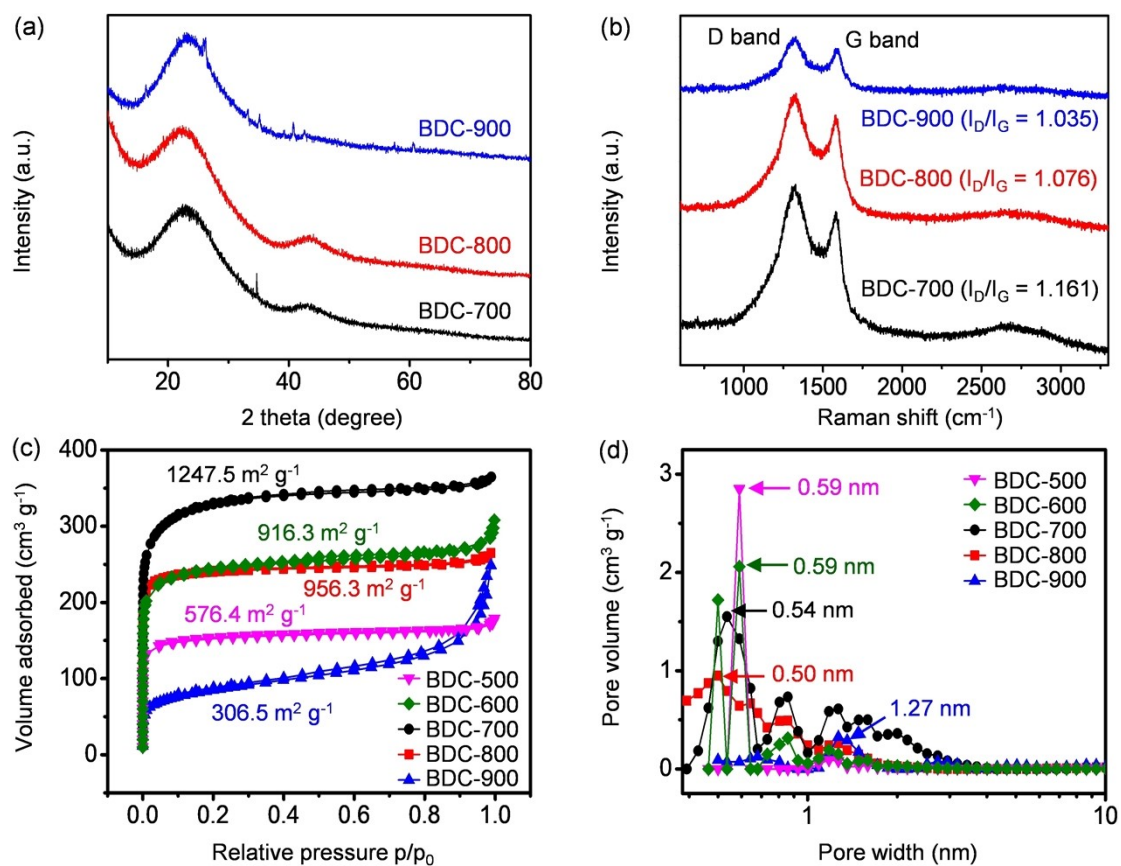

**Fig. S2.** (a) XRD patterns, (b) Raman spectra, (c) N<sub>2</sub> adsorption/desorption isotherms, and (d) the corresponding pore-size distribution curves of BDC-x prepared at five different temperatures (*i.e.*, 500, 600, 700, 800, and 900 °C).

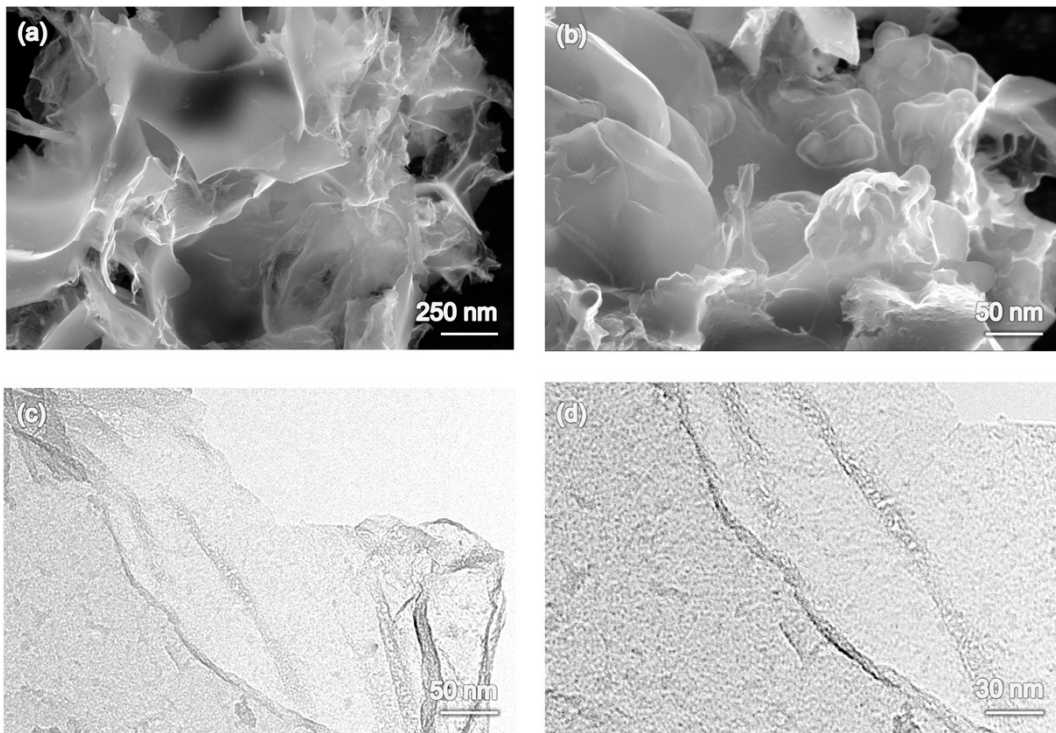

**Fig. S3.** (a,b) SEM, and (c,d) TEM images of BDC-700.

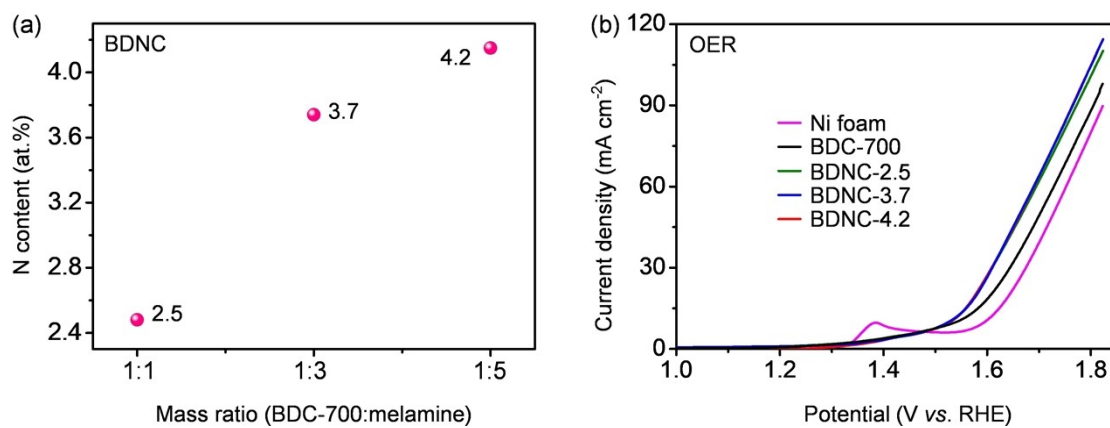

**Fig. S4.** (a) The dependency of the N contents doped in BDNCs on the mass ratio between BDC-700 and melamine. (b) OER polarization curves of Ni foam, BDC-700, and BDNC with different N contents supported on Ni foams.

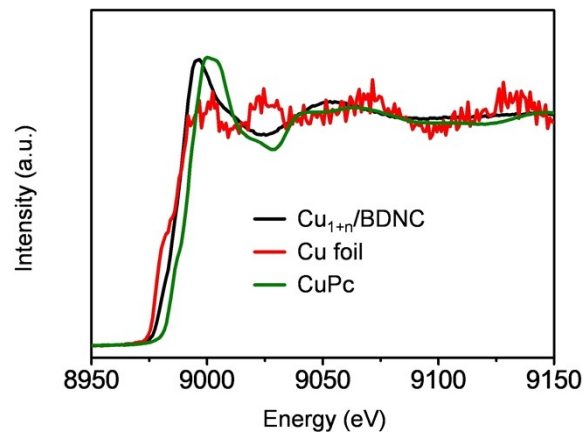

**Fig. S5.** Cu K-edge XANES spectra of  $\text{Cu}_{1+n}/\text{BDNC}$ , Cu foil, and CuPc samples.

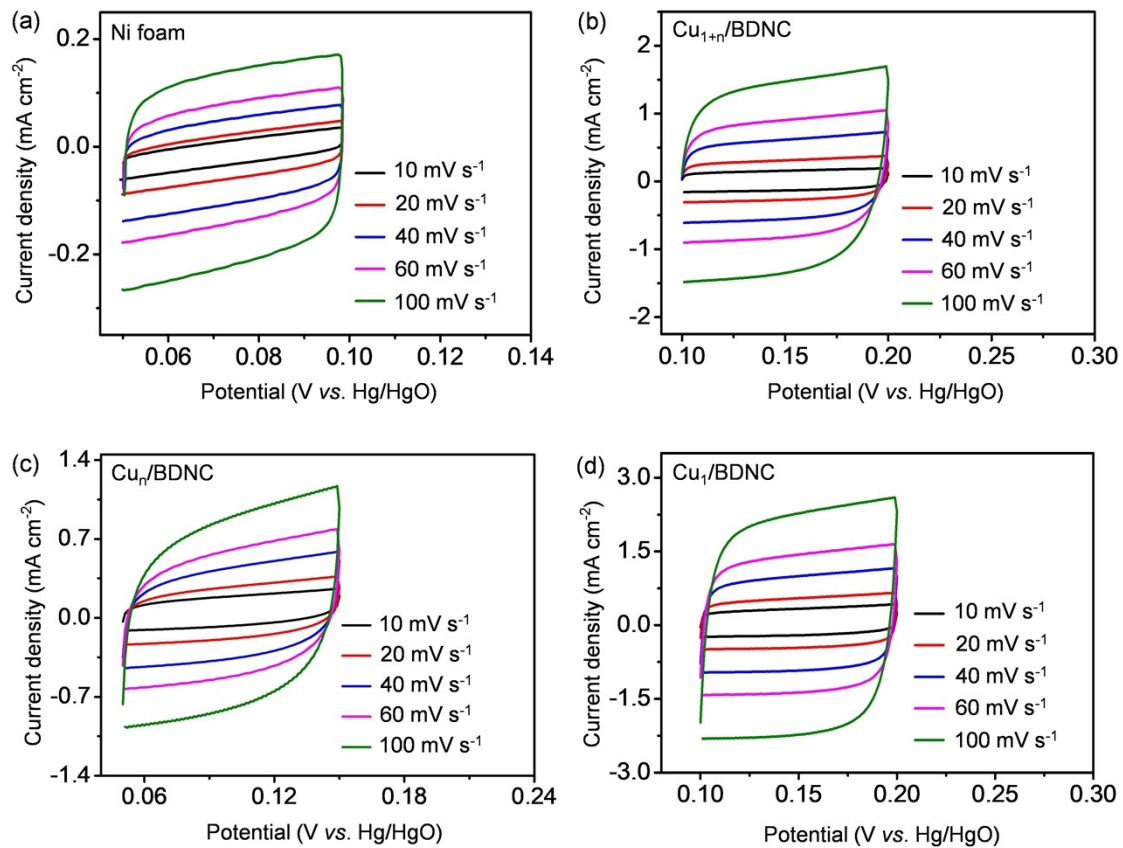

**Fig. S6.** CV curves of (a) Ni foam, (b)  $\text{Cu}_{1+n}/\text{BDNC}$ , (c)  $\text{Cu}_n/\text{BDNC}$ , and (d)  $\text{Cu}_1/\text{BDNC}$  at different scanning rates.

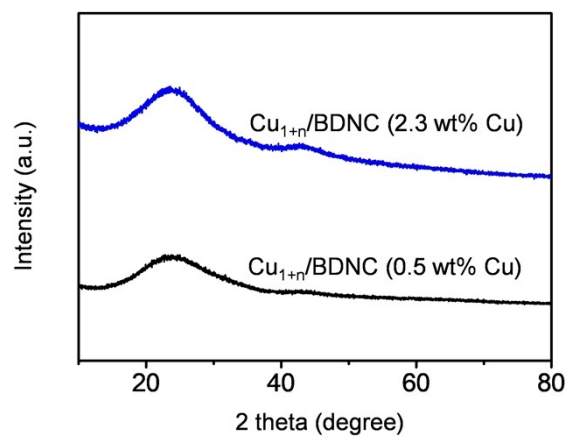

**Fig. S7.** PXRD patterns of Cu<sub>1+n</sub>/BDNC with Cu contents of 0.5 and 2.3 wt.%.



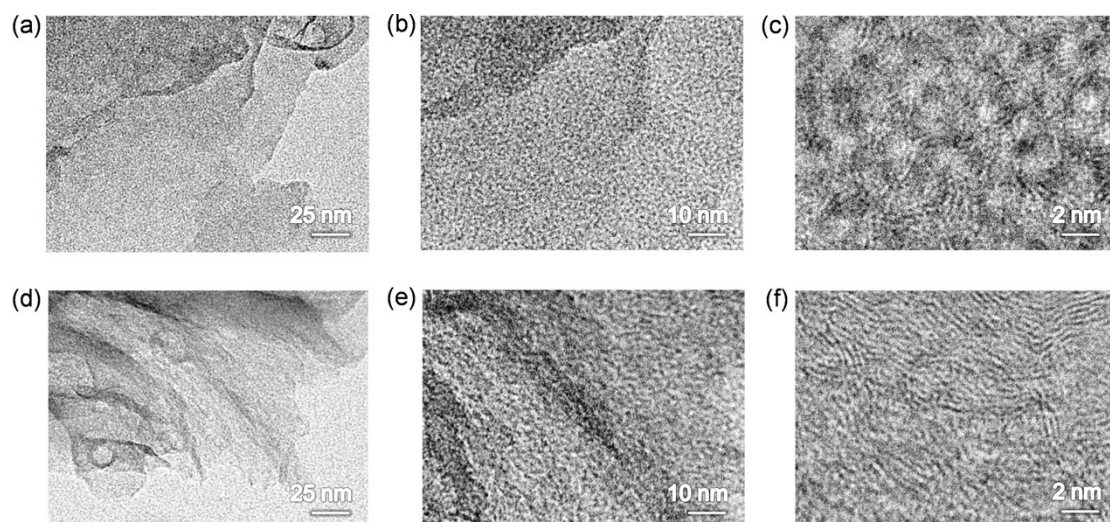

**Fig. S8.** (HR)TEM images of (a-c)  $\text{Cu}_{1+n}/\text{BDNC}$  (0.5 wt.% Cu) and (d-f)  $\text{Cu}_{1+n}/\text{BDNC}$  (2.3 wt.% Cu).

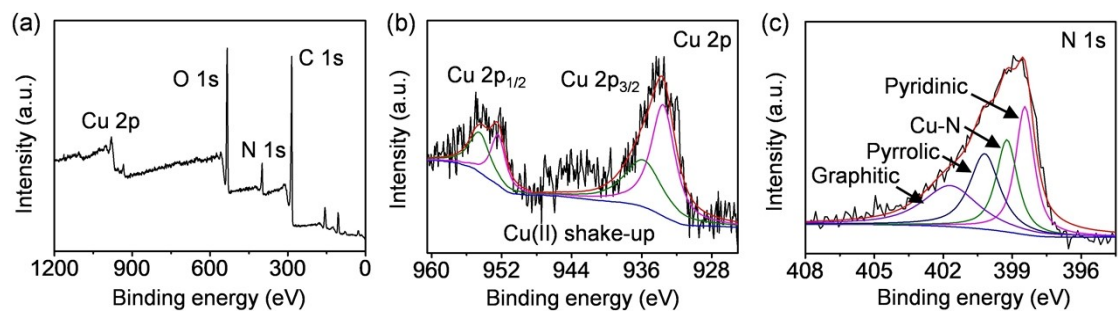

**Fig. S9.** (a) XPS survey, (b) Cu 2p, and (c) N 1s spectra of Cu<sub>1+n</sub>/BDNC (0.5 wt.% Cu).

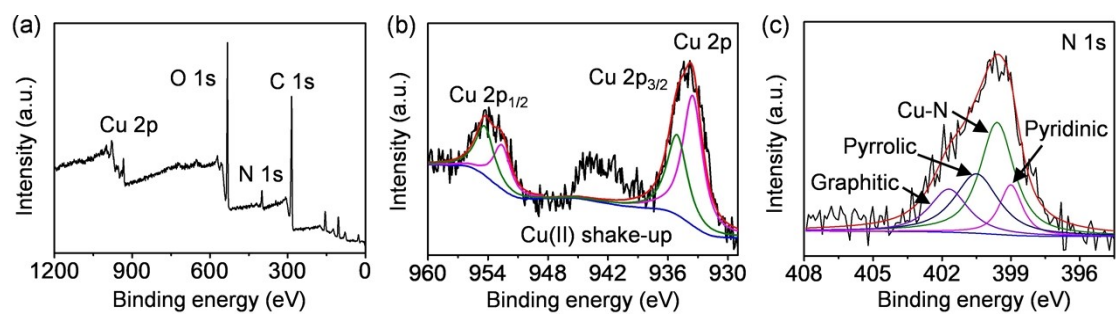

**Fig. S10.** (a) XPS survey, (b) Cu 2p, and (c) N 1s spectra of  $\text{Cu}_{1+n}/\text{BDNC}$  (2.3 wt.% Cu).

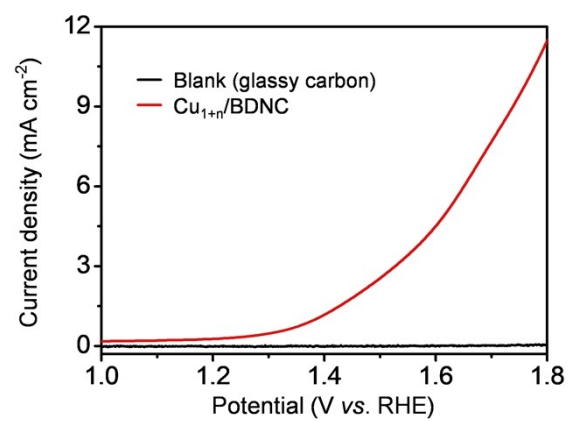

Fig. S11. LSV curves of Cu<sub>1+n</sub>/BDNC on GCE for electrochemical OER testing.

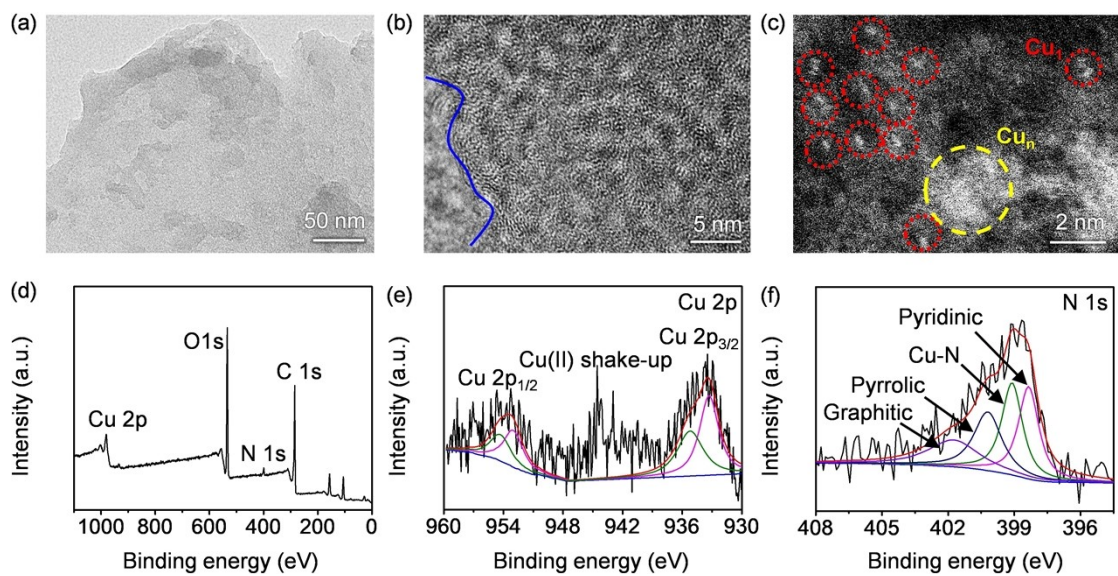

**Fig. S12.** (a) TEM, (b) HRTEM, and (c) HAADF-STEM images, (d) XPS survey, (e) Cu 2p, and (f) N 1s spectra of the used  $\text{Cu}_{1+n}/\text{BDNC}$  after 10 h OER test.
